# Supplementary material for: Population genomics and climate adaptation of a C4 perennial grass, Panicum hallii (Poaceae)
Source: PubMed Central journal article supplement (PMC6211516; doi:10.1186/s12864-018-5179-7), 2018-11-01

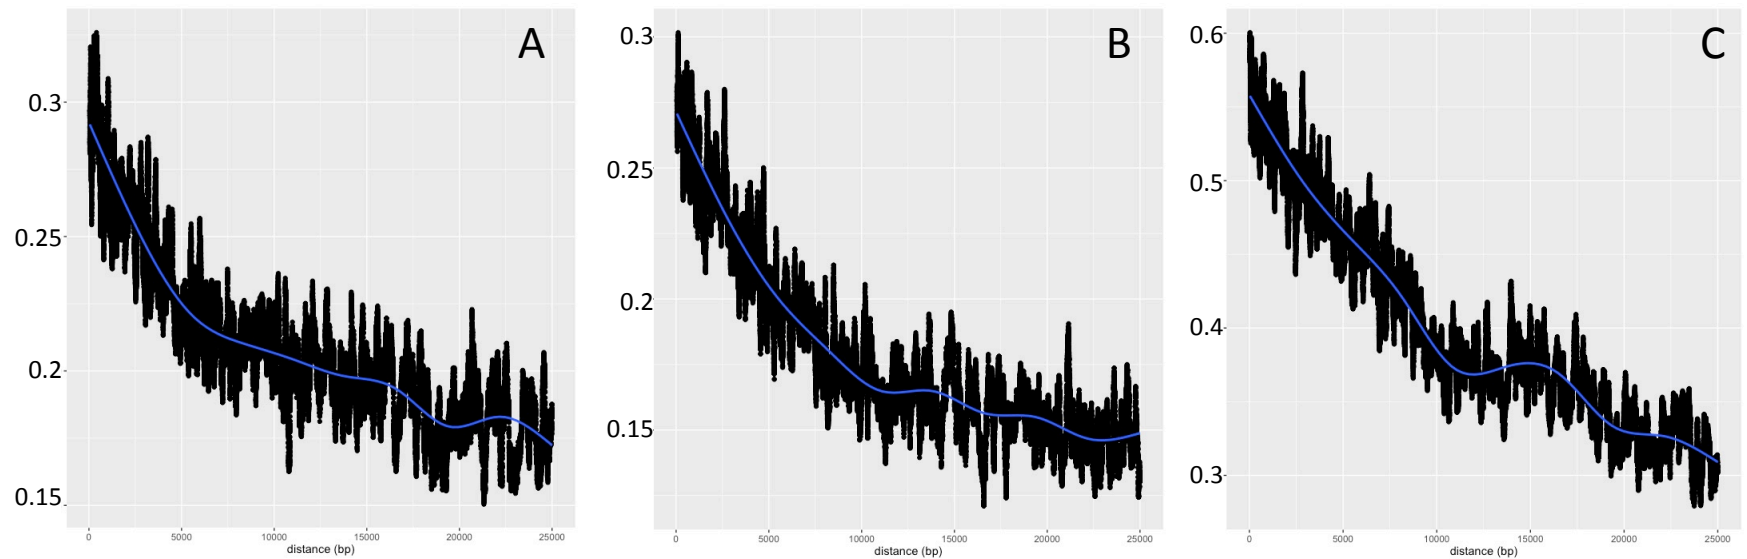

Fig. S1. Linkage ( $r^2$ ) vs. physical distance (bp) between markers. Data are taken from chromosome 1. A) All *P. hallii* individuals. B) *P. hallii* var. *hallii* individuals only (N=78). C) *P. hallii* var. *filipes* individuals only (N=11). Note, distances on the x-axes are the same between plots but linkage on the y-axes differ between plots.



Fig S3. Analysis of climate variation via principal components. A) PCA of precipitation related Bioclim variables. B) PCA of temperature related Bioclim variables. Plots and tables show the loadings of each variable onto the first 2-3 components. Loadings less than abs(0.1) are not shown. Points in the plots represent component values for *P. hallii* sampling sites. The variables chosen for association analysis are in bold.

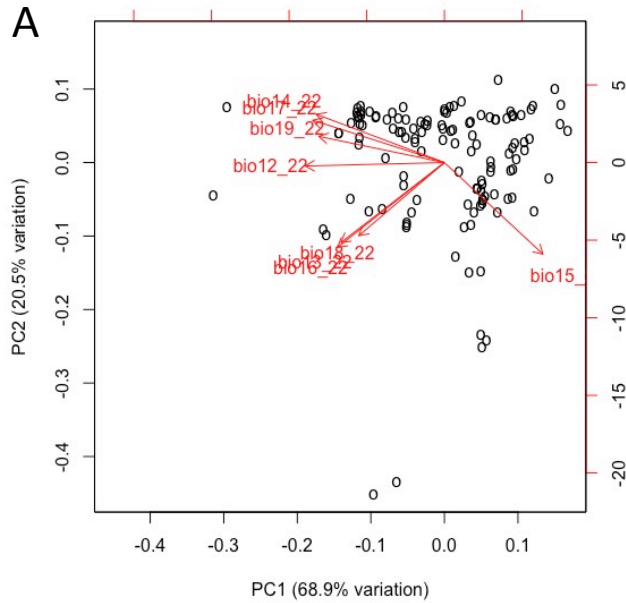

| Precipitation                   | var             | Comp.1        | Comp.2        | Comp.3        |
|---------------------------------|-----------------|---------------|---------------|---------------|
| <b>annual mean precip.</b>      | <b>bio12_22</b> | <b>-0.423</b> |               |               |
| precip. wettest month           | bio13_22        | -0.315        | -0.446        | 0.431         |
| precip. driest month            | bio14_22        | -0.39         | 0.269         |               |
| <b>precip. seasonality</b>      | <b>bio15_22</b> | 0.3           | <b>-0.511</b> | 0.163         |
| precip. wettest quarter         | bio16_22        | -0.325        | -0.473        | 0.195         |
| precip. driest quarter          | bio17_22        | -0.401        | 0.236         |               |
| <b>precip. warmest quarter</b>  | <b>bio18_22</b> | -0.26         | -0.408        | <b>-0.846</b> |
| precip. precip. coldest quarter | bio19_22        | -0.382        | 0.146         | 0.161         |

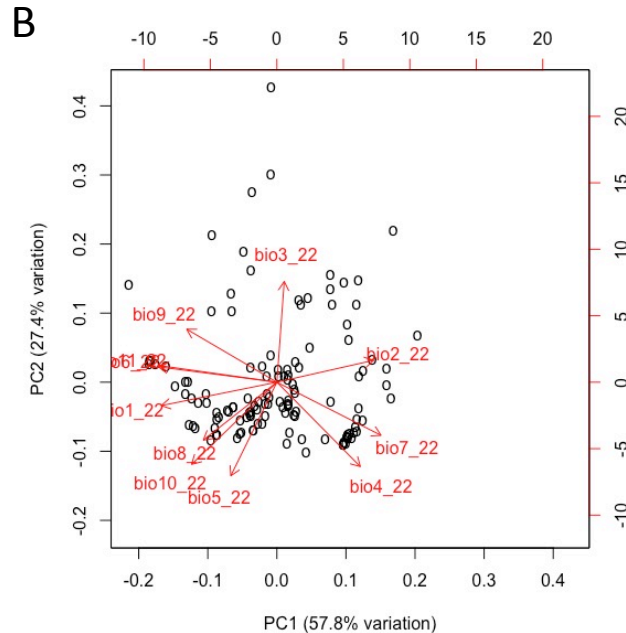

| Temperature                     | var            | Comp.1        | Comp.2       | Comp.3        |
|---------------------------------|----------------|---------------|--------------|---------------|
| temp. warmest quarter           | bio10_22       | -0.282        | -0.395       |               |
| temp. coldest quarter           | bio11_22       | -0.388        |              | -0.106        |
| annual mean temp.               | bio1_22        | -0.382        | -0.113       |               |
| <b>mean daily range</b>         | <b>bio2_22</b> | 0.32          | 0.105        | <b>-0.575</b> |
| <b>isothermality</b>            | <b>bio3_22</b> |               | <b>0.484</b> | -0.539        |
| seasonality                     | bio4_22        | 0.276         | -0.406       |               |
| max. temp. warmest month        | bio5_22        | -0.152        | -0.45        | -0.436        |
| <b>min. temp. coldest month</b> | <b>bio6_22</b> | <b>-0.392</b> |              |               |
| annual range                    | bio7_22        | 0.345         | -0.256       | -0.215        |
| temp. wettest quarter           | bio8_22        | -0.243        | -0.278       | -0.311        |
| temp. driest quarter            | bio9_22        | -0.299        | 0.255        | -0.135        |

**Fig. S4.** Heatmap of 19 Bioclim variables by collection site. Variables have been converted to z-scores. Variables used for association analysis are marked with an asterisk. Columns represent collected individuals, grouped by major STRUCTURE group membership, colored as in Fig. 1.

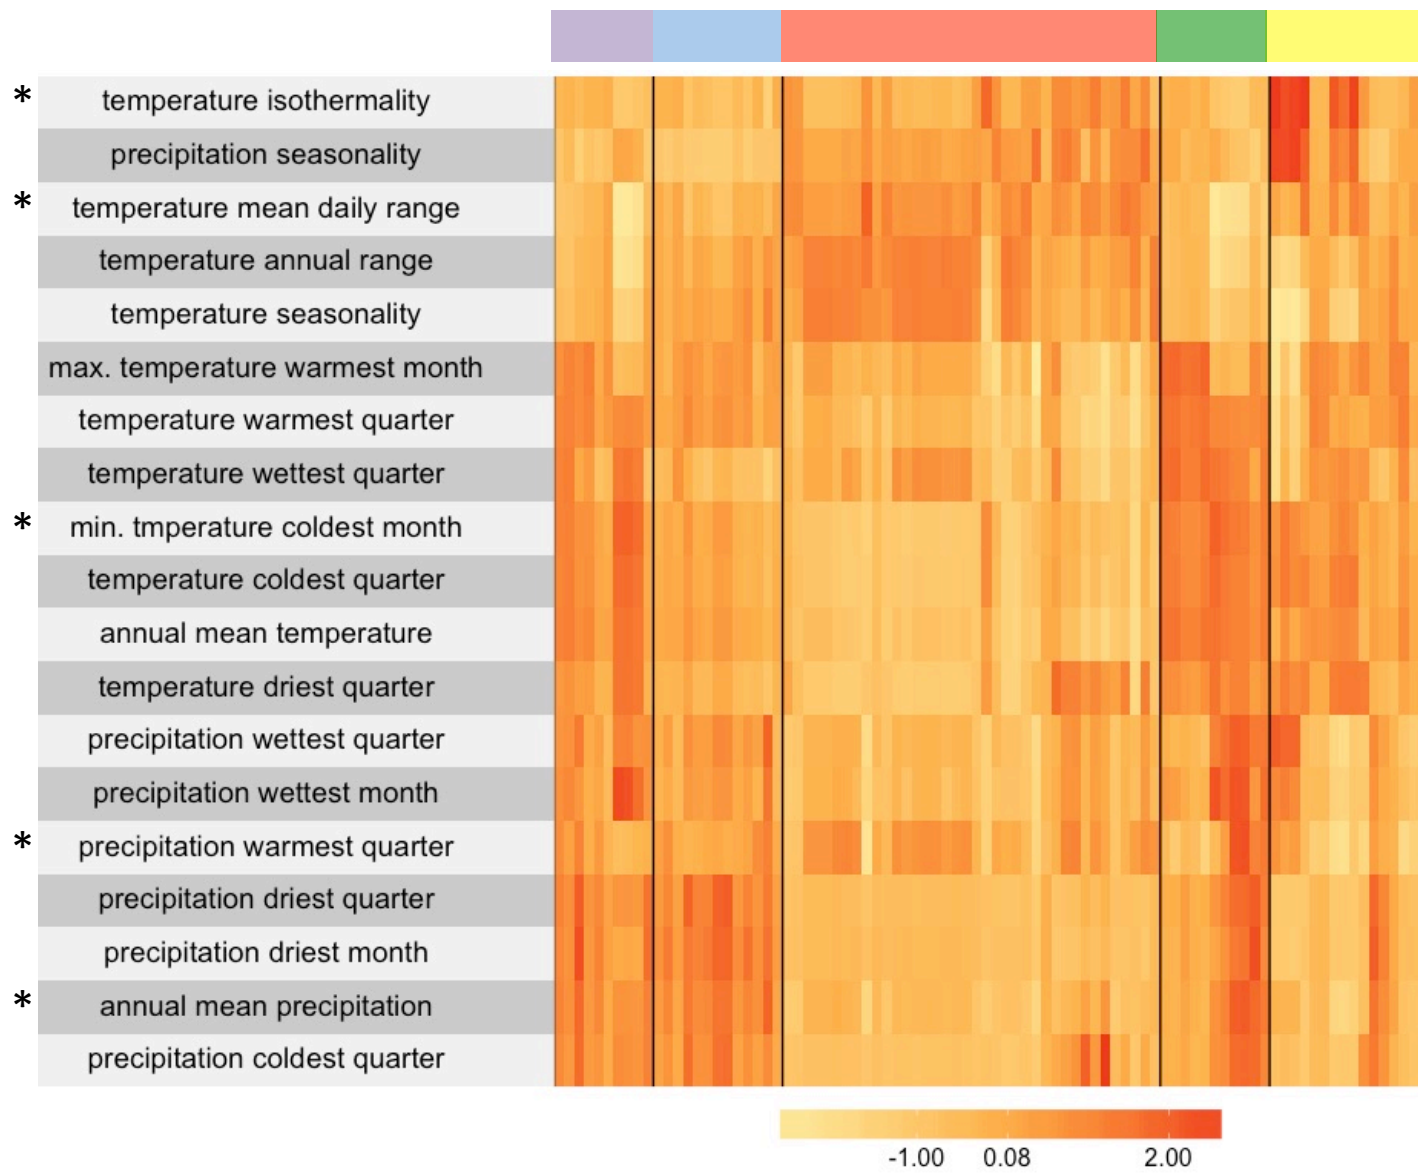

Fig. S5. *P.hallii* range maps with values for each of 5 climate variables used in association analyses. Individual collection sites are shown in black. Grey plots above and right of the maps indicate average climate values by longitude and latitude across the study area, respectively.

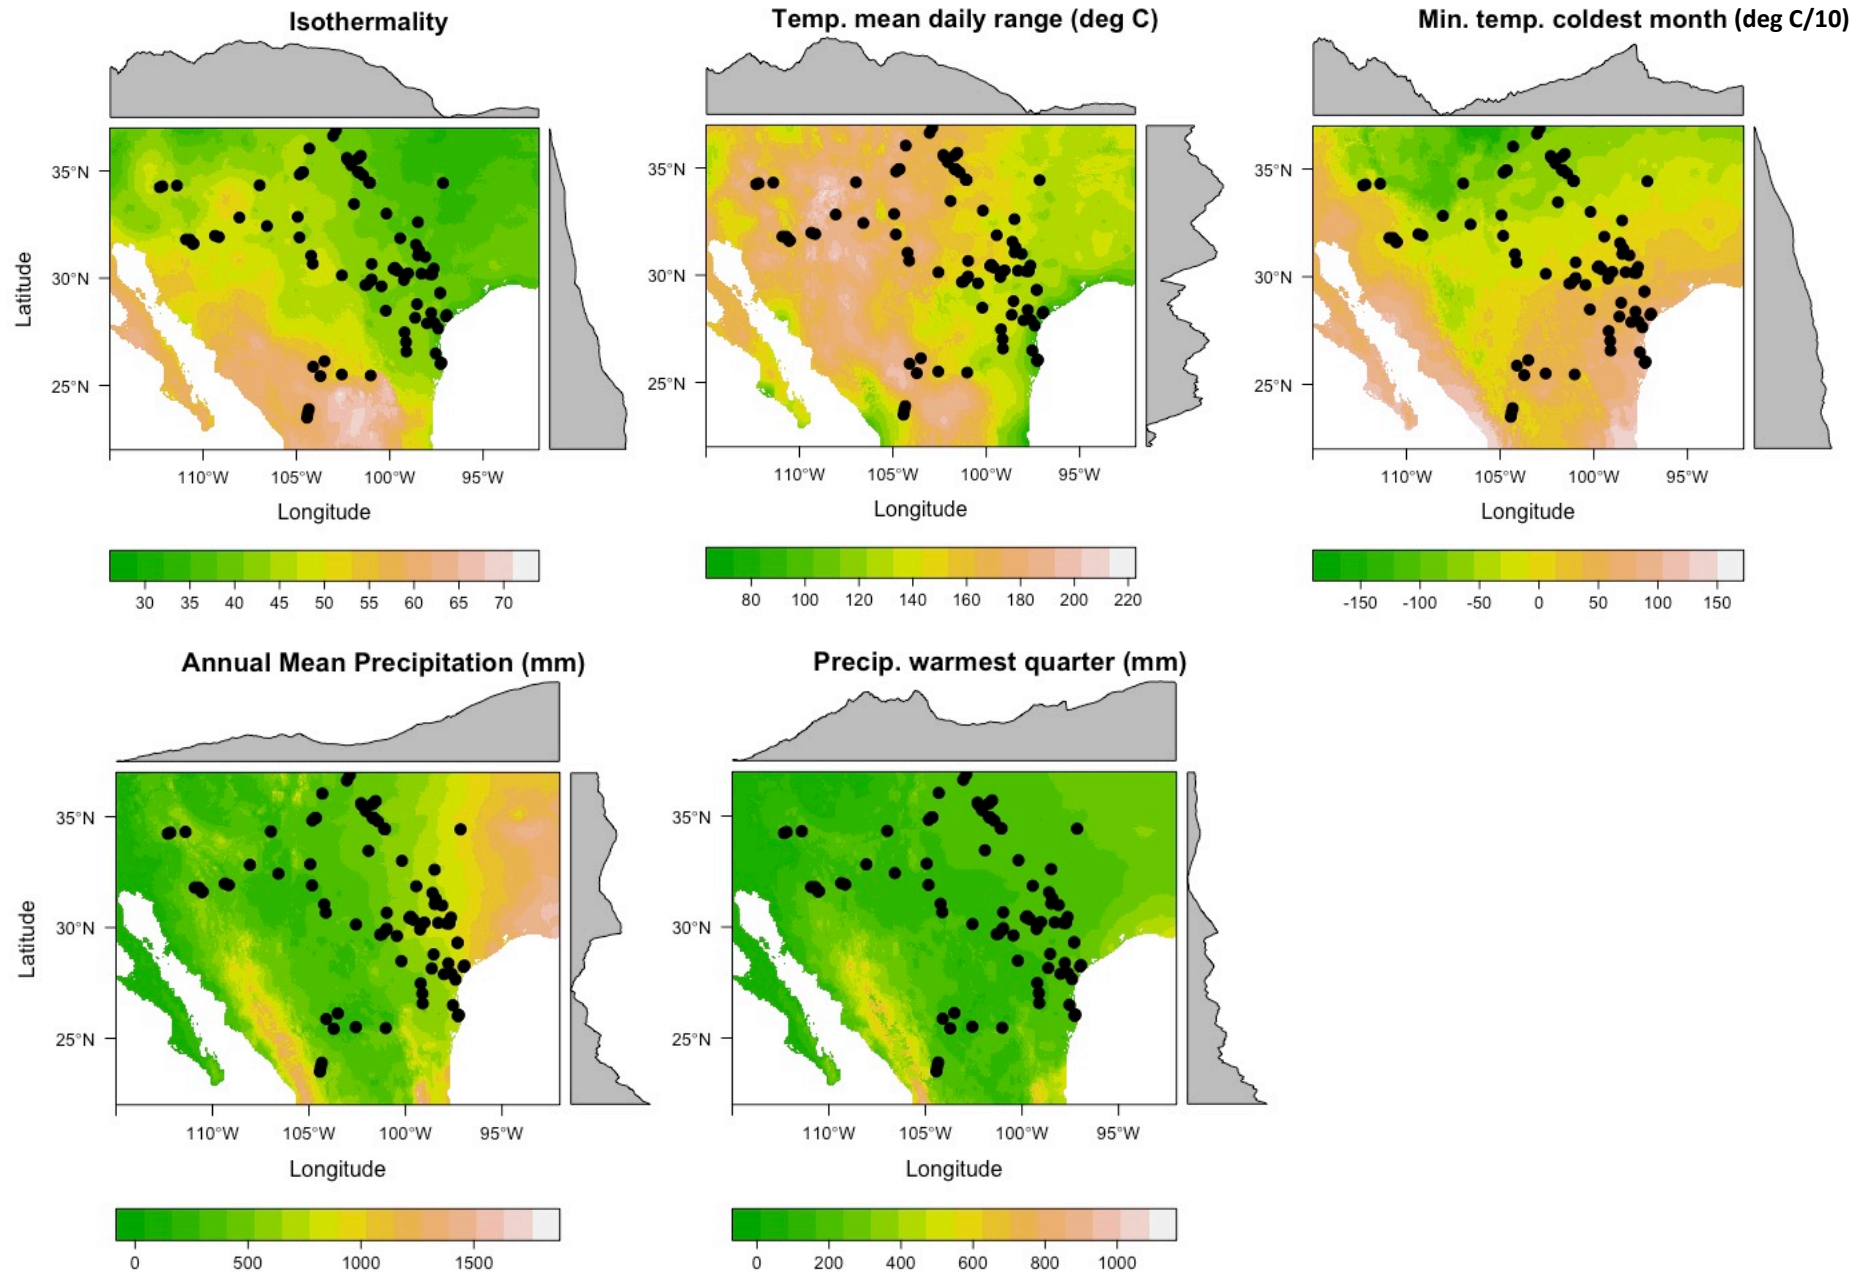

Fig. S6. Manhattan plots of SNP association with climate variables for *P. hallii*. Left: Q-Q plots show expected and observed p-value percentiles. Right: Association p-values for SNPs across the genome. Significantly associated snps are shown in red.

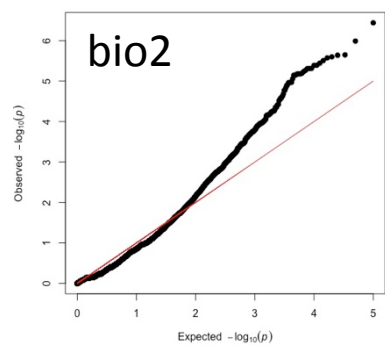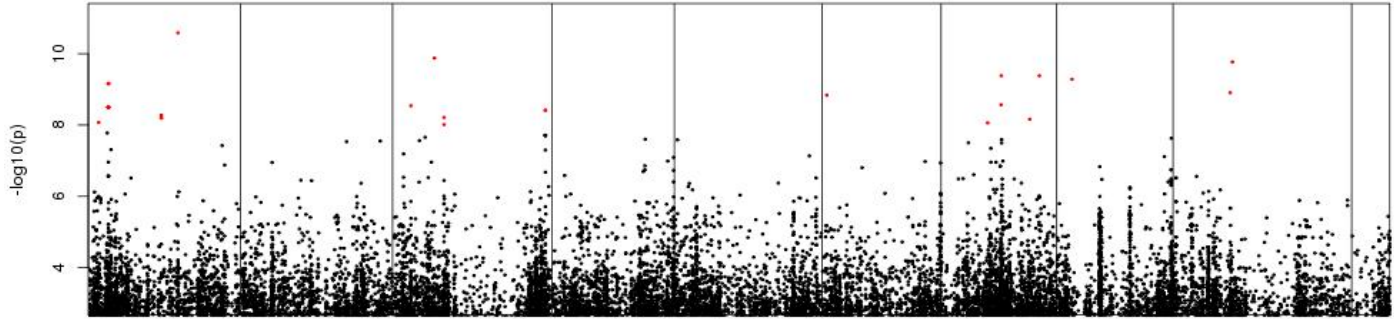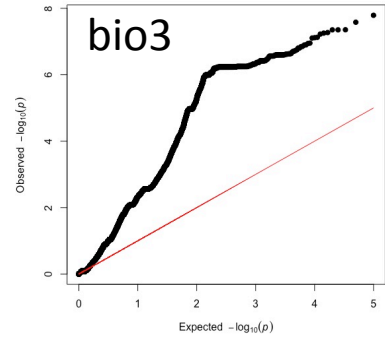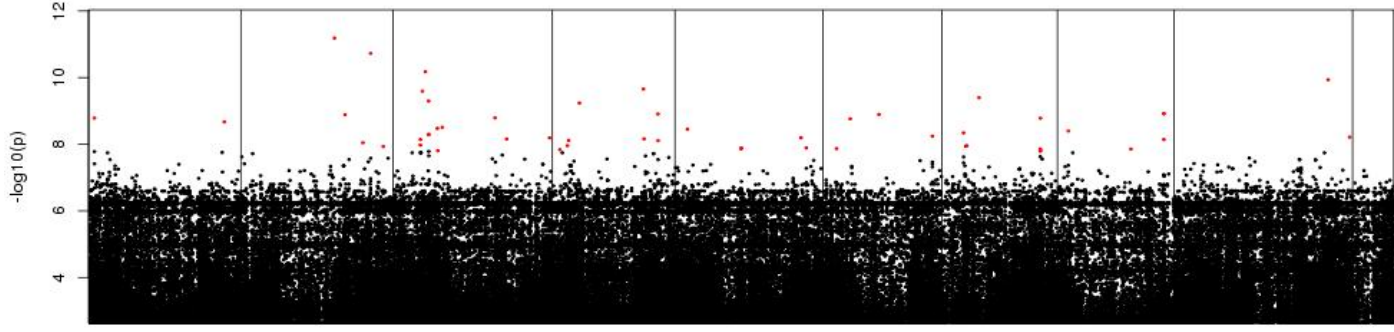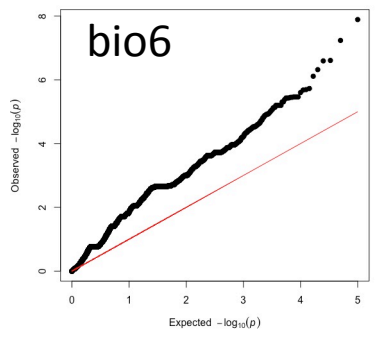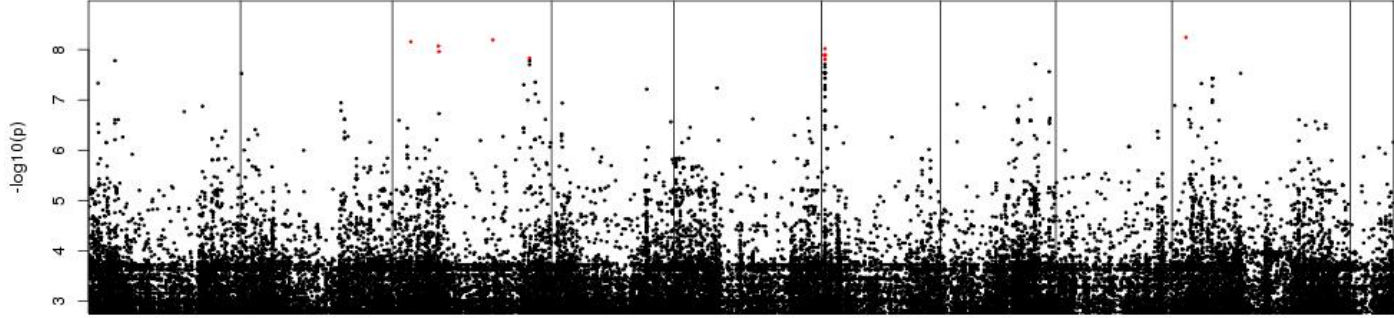

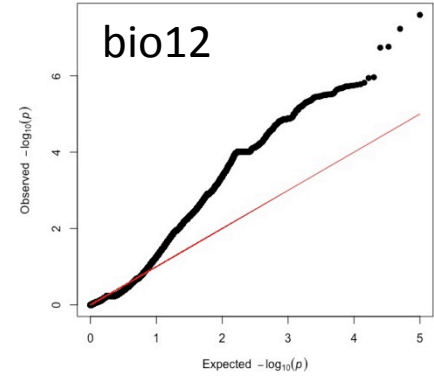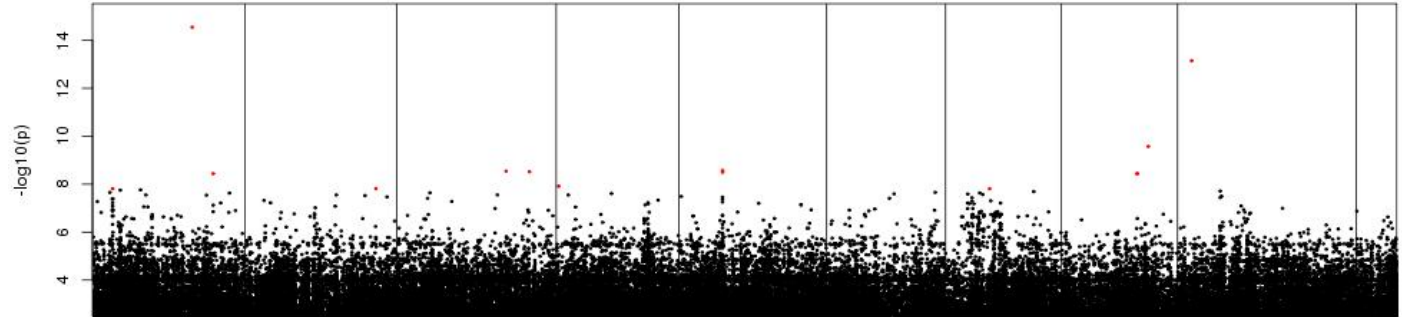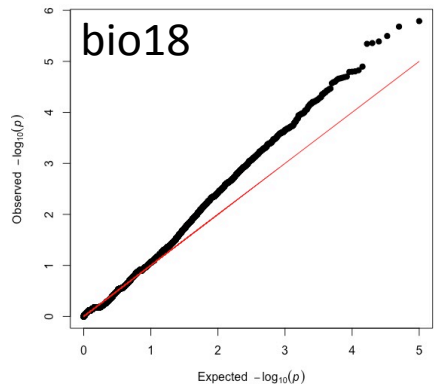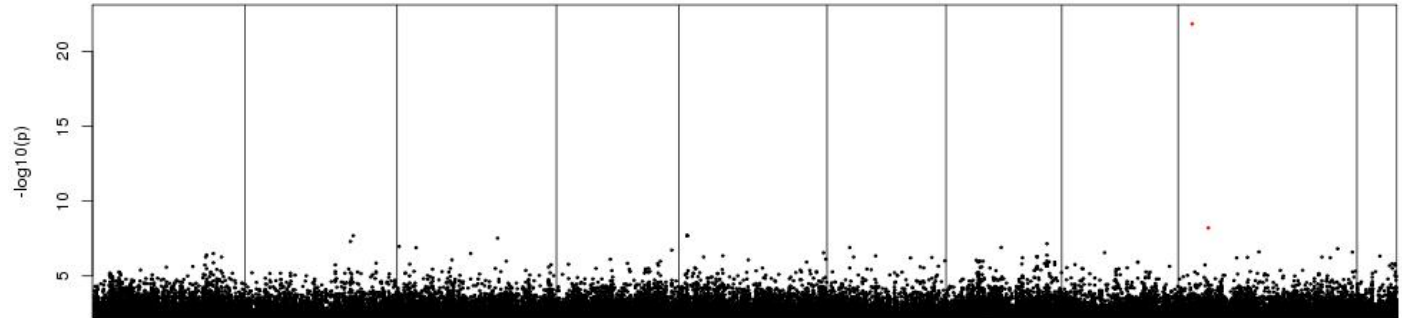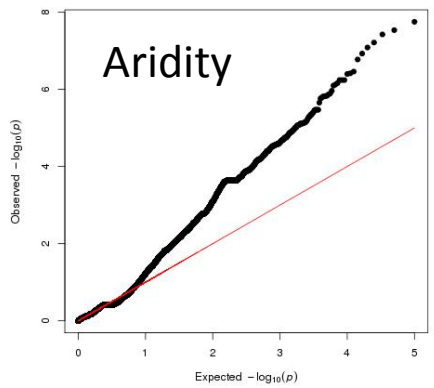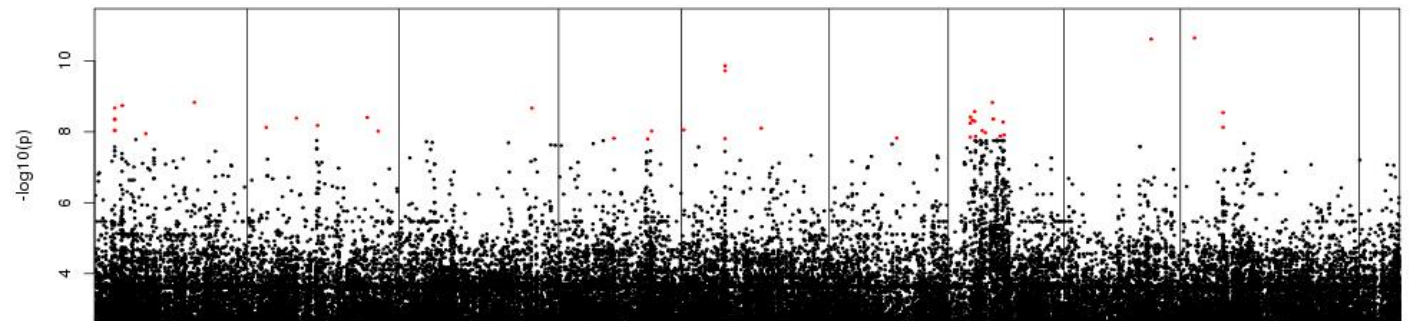

Fig. S6. Manhattan plots of SNP association with climate variables within *P.hallii* var. *hallii*. Left: Q-Q plots show expected and observed p-value percentiles. Right: Association p-values for SNPs across the genome. Significantly associated snps are shown in red.

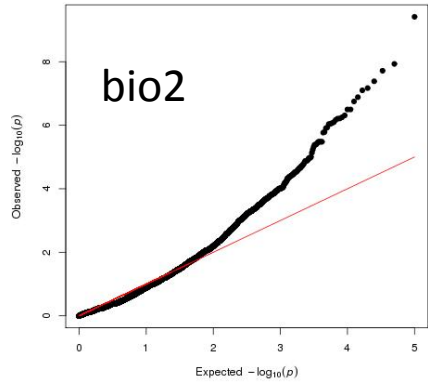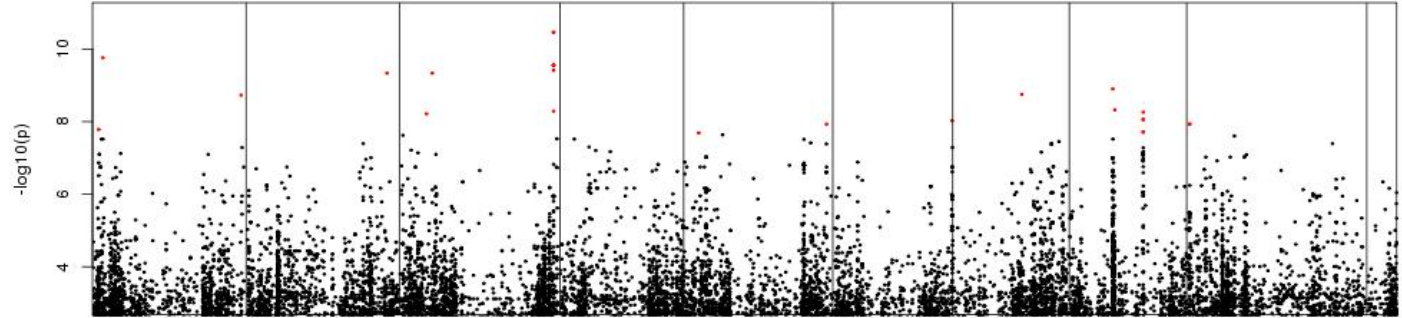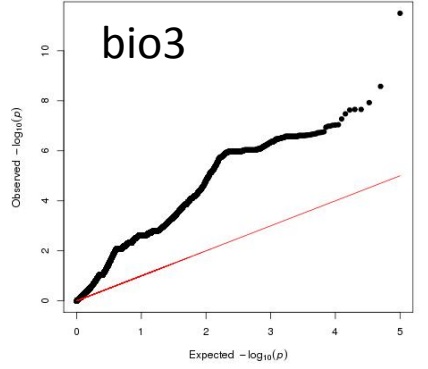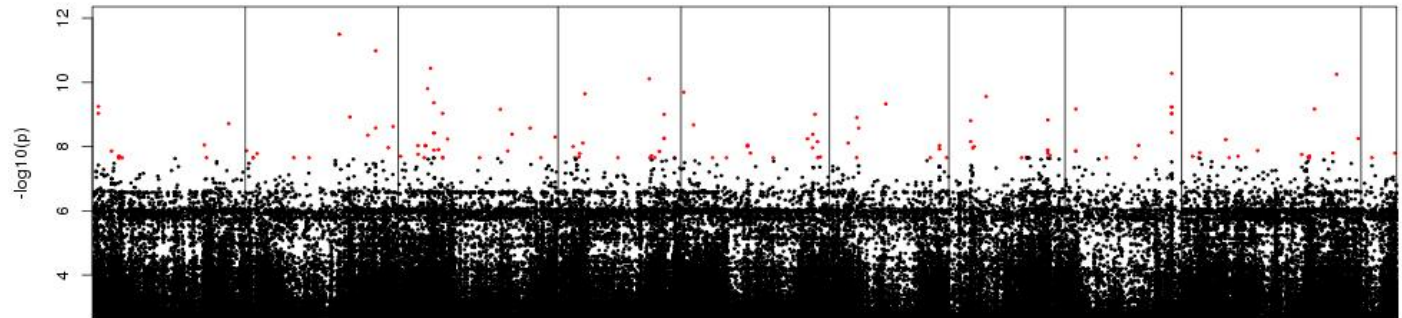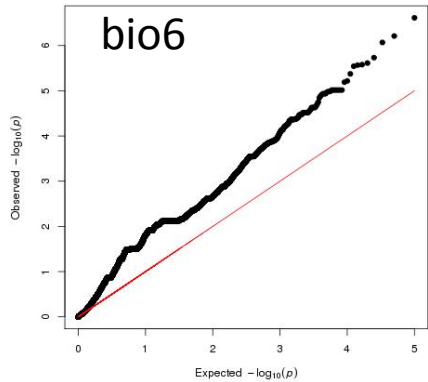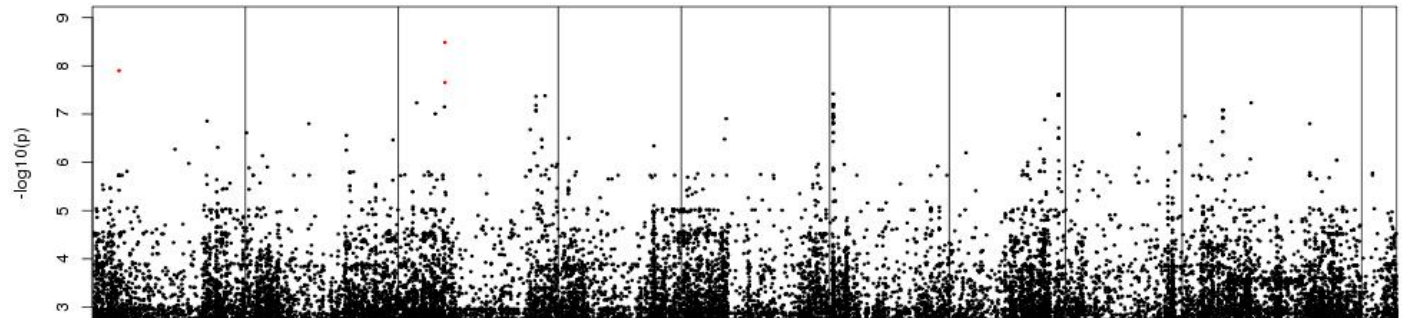



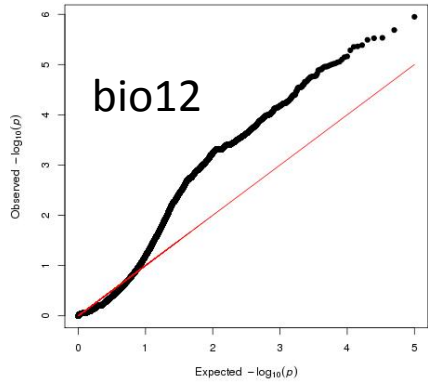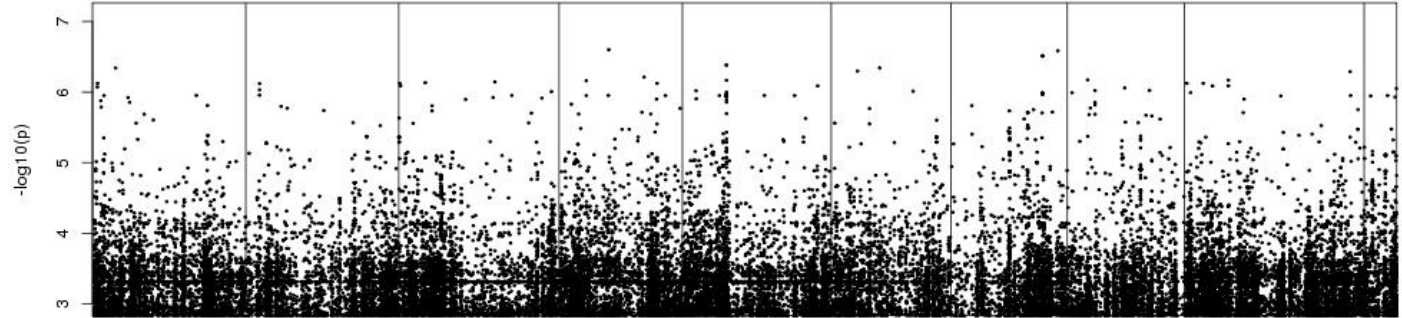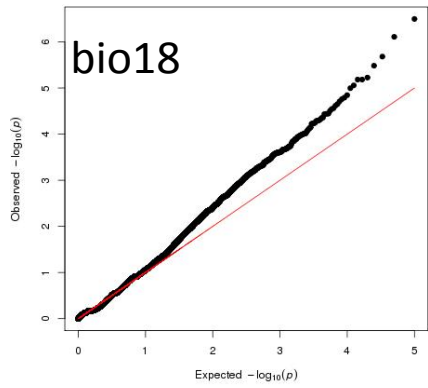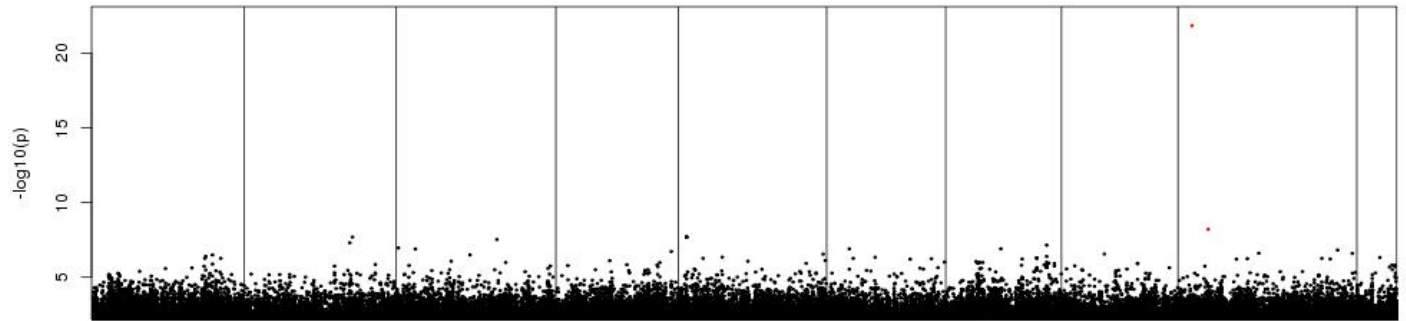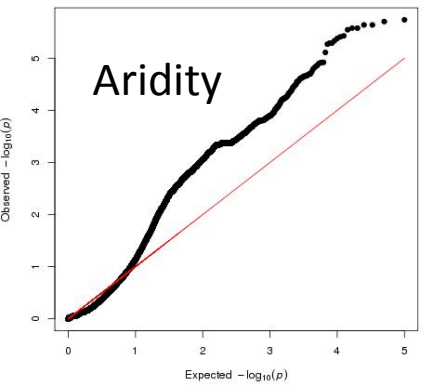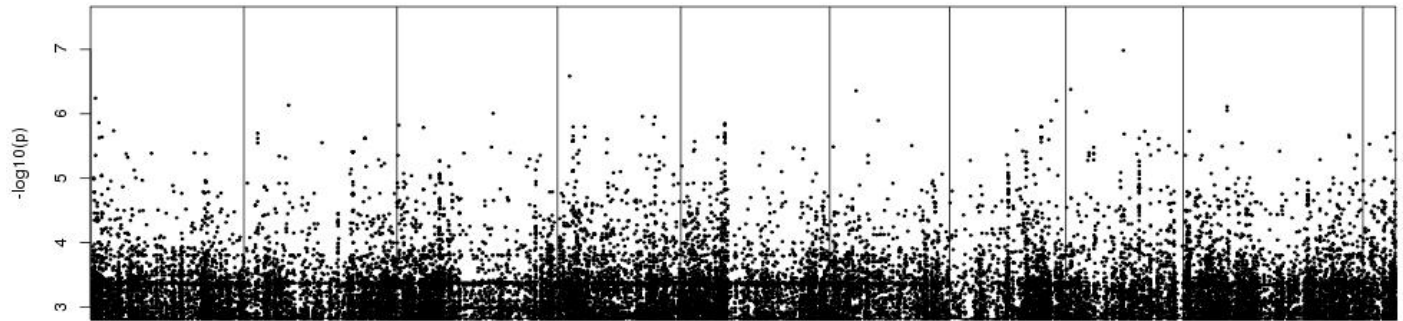

Supplement: 12864_2018_5179_MOESM1_ESM.pdf [file 12864_2018_5179_MOESM1_ESM.pdf]
