# Supplementary material for: Population genomics and climate adaptation of a C4 perennial grass, Panicum hallii (Poaceae)
Source: BMC Genomics. 2018 Nov 1;19:792. doi: 10.1186/s12864-018-5179-7 (PMC6211516; doi:10.1186/s12864-018-5179-7)
Supplement: Supplementary file 2 — Table S1. GO terms significantly associated with each climate variable. Table S2. Candidate genes containing climate associated SNPs. Table S3. Collection locations and SRA accession numbers for sequenced plants. Table S4. RDA analysis of SNP variation. Table S5. Analysis of isolation by distance. (XLSX 26 kb) [file 12864_2018_5179_MOESM2_ESM.xlsx]

## Sheet: TableS1
Climate Variable	Enrichd GOs	GO.term	Annotated	Significant	Expected	p-value
bio2	GO:0016129	phytosteroid biosynthetic process	68	1	0.01	0.0098
	GO:0016132	brassinosteroid biosynthetic process	68	1	0.01	0.0098
	GO:0016128	phytosteroid metabolic process	70	1	0.01	0.0101
	GO:0016131	brassinosteroid metabolic process	70	1	0.01	0.0101
	GO:0006694	steroid biosynthetic process	121	1	0.02	0.0174
	GO:0008202	steroid metabolic process	135	1	0.02	0.0194
	GO:0042446	hormone biosynthetic process	153	1	0.02	0.0219
	GO:0042445	hormone metabolic process	182	1	0.03	0.026
	GO:0010817	regulation of hormone levels	273	1	0.04	0.0389
	GO:1901617	organic hydroxy compound biosynthetic pr...	338	1	0.05	0.048
bio3	GO:0009819	drought recovery	3	1	0.01	0.0085
	GO:0010731	protein glutathionylation	3	1	0.01	0.0085
	GO:0006743	ubiquinone metabolic process	17	1	0.05	0.0472
	GO:0006744	ubiquinone biosynthetic process	17	1	0.05	0.0472
bio6	none
bio12	none
bio18	GO:0019852	L-ascorbic acid metabolic process	14	1	0	0.0034
	GO:0019853	L-ascorbic acid biosynthetic process	14	1	0	0.0034
	GO:0042364	water-soluble vitamin biosynthetic proce...	35	1	0.01	0.0084
	GO:0006767	water-soluble vitamin metabolic process	36	1	0.01	0.0086
	GO:0009110	vitamin biosynthetic process	43	1	0.01	0.0103
	GO:0006766	vitamin metabolic process	75	1	0.02	0.0179
	GO:0000041	transition metal ion transport	102	1	0.02	0.0243
	GO:0046364	monosaccharide biosynthetic process	129	1	0.03	0.0307
Aridity	GO:0022611	dormancy process	118	1	0.03	0.0336
	GO:0010431	seed maturation	137	1	0.04	0.0389
	GO:0006972	hyperosmotic response	160	1	0.05	0.0453
	GO:0009845	seed germination	177	1	0.05	0.05
	GO:0043289	apocarotenoid biosynthetic process	27	1	0.01	0.0078
	GO:0016106	sesquiterpenoid biosynthetic process	30	1	0.01	0.0086
	GO:0043288	apocarotenoid metabolic process	30	1	0.01	0.0086
	GO:0006714	sesquiterpenoid metabolic process	35	1	0.01	0.0101
	GO:0046165	alcohol biosynthetic process	86	1	0.02	0.0246
	GO:0023051	regulation of signaling	93	1	0.03	0.0266
	GO:0042538	hyperosmotic salinity response	95	1	0.03	0.0271
	GO:0009739	response to gibberellin	99	1	0.03	0.0283
	GO:0010162	seed dormancy process	118	1	0.03	0.0336
	GO:0006066	alcohol metabolic process	126	1	0.04	0.0358
	GO:0048444	floral organ morphogenesis	139	1	0.04	0.0395
	GO:0009311	oligosaccharide metabolic process	158	1	0.05	0.0448
	GO:0016114	terpenoid biosynthetic process	172	1	0.05	0.0487
	GO:0009937	regulation of gibberellic acid mediated	11	1	0	0.0032
	GO:0010325	raffinose family oligosaccharide biosynt...	7	1	0	0.002
	GO:0010648	negative regulation of cell communicatio...	45	1	0.01	0.0129
	GO:0010646	regulation of cell communication	96	1	0.03	0.0274
	GO:0009938	negative regulation of gibberellic acid	5	1	0	0.0014
	GO:0071370	cellular response to gibberellin stimulu...	54	1	0.02	0.0155
	GO:0071395	cellular response to jasmonic acid stimu…	173	1	0.05	0.0489
	GO:0090697	post-embryonic plant organ morphogenesis	174	1	0.05	0.0492
	GO:2000377	regulation of reactive oxygen species	122	1	0.04	0.0347
	GO:0010476	gibberellin mediated signaling pathway	53	1	0.02	0.0152
	GO:0009688	abscisic acid biosynthetic process	27	1	0.01	0.0078
	GO:1902645	tertiary alcohol biosynthetic process	27	1	0.01	0.0078
	GO:0009687	abscisic acid metabolic process	30	1	0.01	0.0086
	GO:1902644	tertiary alcohol metabolic process	30	1	0.01	0.0086
	GO:0009968	negative regulation of signal transducti...	45	1	0.01	0.0129
	GO:0023057	negative regulation of signaling	45	1	0.01	0.0129
	GO:0009740	gibberellic acid mediated signaling path...	52	1	0.02	0.0149
	GO:0009867	jasmonic acid mediated signaling pathway	173	1	0.05	0.0489
	GO:0009966	regulation of signal transduction	92	1	0.03	0.0263
	GO:0009312	oligosaccharide biosynthetic process	26	1	0.01	0.0075

## Sheet: TableS2
Candidate genes containing climate associated SNPs
genes	closest homolog	putative function	Associated bioclim variable
Pahal.A01501	none	unknown	bio2
Pahal.A02411	AT5G39080	HXXXD-type acyl-transferase family protein	bio12
Pahal.B01462	AT3G43600	aldehyde oxidase 2	AI
Pahal.B02557	none	unknown	bio3
Pahal.B02558	none	unknown	bio3
Pahal.B03753	AT1G61610	S-locus lectin protein kinase family protein	bio3
Pahal.B04512	AT5G67590	NADH-ubiquinone oxidoreductase-related	bio3
Pahal.C01862	AT4G18570	Tetratricopeptide repeat (TPR)-like superfamily protein	bio3
Pahal.C02015	AT4G13400	2-oxoglutarate (2OG) and Fe(II)-dependent oxygenase superfamily protein	bio3
Pahal.C02221	AT4G18820	AAA-type ATPase family protein	bio3
Pahal.C02919	AT1G77410	beta-galactosidase 16	bio3
Pahal.C02948	none	unknown	bio3
Pahal.C03041	AT5G45540	Protein of unknown function (DUF594)	bio6
Pahal.C03389	none	unknown	bio12
Pahal.C03739	AT2G19390	unknown	bio3
Pahal.C04618	none	unknown	bio2
Pahal.C04619	none	unknown	bio2
Pahal.D00124	AT5G28780	PIF1 helicase	bio12
Pahal.D00511	AT2G34630	geranyl diphosphate synthase 1	bio3
Pahal.D01266	AT5G41020	myb family transcription factor	bio3
Pahal.D01302	AT5G10770	Eukaryotic aspartyl protease family protein	AI
Pahal.D02752	none	unknown	bio3
Pahal.D02753	AT1G70670	Caleosin-related family protein	bio3
Pahal.E00873	AT1G19485	Transducin/WD40 repeat-like superfamily protein	bio3
Pahal.E03362	AT5G12430	Heat shock protein DnaJ with tetratricopeptide repeat	bio3
Pahal.E03675	AT1G48960	Adenine nucleotide alpha hydrolases-like superfamily protein	bio3
Pahal.F00113	AT4G24790	AAA-type ATPase family protein	bio2
Pahal.F00192	AT1G71490	Tetratricopeptide repeat (TPR)-like superfamily protein	bio6
Pahal.F00193	AT5G07860	HXXXD-type acyl-transferase family protein	bio6
Pahal.F01525	AT1G21240	wall associated kinase 3	bio3
Pahal.F01925	AT3G05990	Leucine-rich repeat (LRR) family protein	bio3
Pahal.G00754	AT3G07570	Cytochrome b561/ferric reductase transmembrane with DOMON related domain	bio2
Pahal.G01667	AT1G66350	RGA-like 1	AI
Pahal.G02006	AT2G45510	cytochrome P450, family 704, subfamily A, polypeptide 2	bio2
Pahal.G02025	AT5G17570	TatD related DNase	bio3
Pahal.H00646	none	unknown	bio3
Pahal.H00647	AT5G10290	leucine-rich repeat transmembrane protein kinase family protein	bio3
Pahal.H01937	none	unknown	bio2
Pahal.H02380	AT5G50700	hydroxysteroid dehydrogenase 1	bio3
Pahal.H02381	none	unknown	bio3
Pahal.I00145	AT2G42010	phospholipase D beta 1	bio3
Pahal.I01730	none	unknown	bio6 + AI
Pahal.I02747	AT2G46750	D-arabinono-1,4-lactone oxidase family protein	bio18
Pahal.I03327	AT5G13250	RING finger protein	bio6
Pahal.I04481	AT3G55040	glutathione transferase lambda 2	bio3

## Sheet: Table S3
Population Code	State of Collection	Longitude	Latitude	NCBI SRA Accession number
ABI	Texas	-99.4422	31.8599	SRP048175
ALI	Texas	-101.701	35.5739	SRP048178
ARA	Texas	-96.987	28.2237	SRP087701
ARB	Oklahoma	-97.1467	34.4298	SRP053912
ARR	Arizona	-110.506	31.6134	SRP053672
ART	New Mexico	-104.932	32.8567	SRP048179
ATA	Texas	-98.5413	28.7897	SRP087704
ATO	Durango	-104.396	23.693	SRR8039422
AWR	Texas	-96.9457	28.2851	SRP053682
BEE	Texas	-97.7792	28.3828	SRP053914
BME	Oklahoma	-102.887	36.8753	SRP048180
BUS	Texas	-102.061	35.2649	SRP048181
CAM	Texas	-97.269	26.0007	SRP087694
CBS	Texas	-98.4839	31.0574	SRP087698
CCG	Texas	-101.082	34.4468	SRP048182
CCL	Texas	-101.075	34.4441	SRP092716
CCO	Texas	-101.056	34.4379	SRP092717
CDM	Coahuila	-102.57	25.5083	SRR8037336
CHA	Texas	-102.297	35.6052	SRP048183
CKR	Arizona	-112.315	34.2342	SRP053913
CLA	New Mexico	-103.037	36.6364	SRP053675
CLD	Texas	-101.436	34.7984	SRP048184
CNF	Arizona	-110.915	31.8021	SRX183870
COM	Texas	-101.208	29.7018	SRP053919
COR	Arizona	-112.179	34.2862	SRX183042
CRC	Texas	-102.265	35.5298	SRP048185
DOF	Texas	-100.995	29.8946	SRP015622
DRB	Texas	-100.971	29.9412	SRP047613
ELG	Arizona	-110.559	31.6009	SRP053671
EPS	Texas	-100.21	28.4826	SRX183039
ESE	Texas	-99.5894	30.3482	SRP047646
FIL5	Texas	-97.4039	27.6496	SRP081853
GEO	New Mexico	-104.309	36.0429	SRP047649
GMO	Texas	-104.839	31.9018	SRP087699
GNF	Texas	-97.3001	29.3119	SRR1797841
GNH	Texas	-97.3001	29.3119	SRR1797818
GRA	Texas	-99.2431	29.9149	SRP047653
HAL	Texas	-97.874	30.185	SRP085034
HAM	Texas	-100.181	33.0098	SRP048188
HUE	Texas	-99.0156	30.2255	SRP081863
HWY	Texas	-101.11	34.4691	SRP048189
JHC	Texas	-98.307	30.2072	SRP113372
JWE	Texas	-98.0055	27.894	SRP087700
KIC	Texas	-100.443	29.6185	SRP047656
KNT	Texas	-104.212	31.0499	SRP015438
LAR	Texas	-99.2092	27.4773	SRX183040
LBY	New Mexico	-104.641	34.945	SRP048190
LMA	Texas	-99.7314	30.0164	SRP077325
LME	Texas	-101.547	35.7073	SRP048191
LOS	Coahuila	-101.024	25.4619	SRP048192
MAP	Durango	-104.105	25.872	SRR8039424
MCM	Texas	-98.6385	28.1519	SRP087702
MEZ	Durango	-104.432	23.4945	SRR8039423
MKF	Texas	-97.7251	30.1777	SRP087693
NDD	Durango	-104.335	23.8979	SRR8039663
NDP	Texas	-97.6076	27.9117	SRP047659
NMX	New Mexico	-106.581	32.4299	SRP081862
NOH	Texas	-97.5453	26.4949	SRP081866
PAJ	Texas	-99.7376	30.4854	SRP081857
PCR	Arizona	-109.363	31.9802	SRP053676
PDB	Texas	-101.637	34.9287	SRP048193
PDF	Texas	-101.661	34.9437	SRP048194
PDK	Texas	-101.689	34.9475	SRP092714
PDL	Texas	-101.689	34.9475	SRP092721
PDS	Texas	-101.653	34.9395	SRP092719
PFL	Texas	-97.6386	30.4506	SRP092718
PIN	Arizona	-111.401	34.3161	SRX183043
PIS	Texas	-97.2735	26.0173	SRP092736
POI	Texas	-97.2375	26.0643	SRX183046
PRT	Arizona	-109.155	31.9159	SRP053673
RAN	Texas	-101.914	33.4601	SRP113369
SAN	Texas	-102.563	30.1346	SRP081859
SAP	Durango	-103.716	25.4331	SRR8039425
SEM	Texas	-101.31	29.681	SRP081855
SEV	New Mexico	-106.974	34.3317	SRP047672
SLS	Texas	-98.1008	30.9913	SRP047676
SMF	Texas	-98.4387	31.3052	SRP113370
SMT	Texas	-98.5992	31.5616	SRP092734
SNO	Arizona	-110.703	31.8005	SRP047691
SPE	Texas	-100.971	30.6664	SRP047705
SPJ	Texas	-99.7308	30.47	SRP087696
SPR	Texas	-104.128	30.6722	SRP047712
STW	Texas	-98.4896	32.6093	SRP047728
SVN	New Mexico	-104.827	34.8311	SRP048196
TLA	Durango	-103.499	26.1281	SRR8039662
TNK	New Mexico	-104.694	34.9369	SRP048198
WBW	Texas	-99.7958	30.4329	SRP047733
ZAF	Texas	-99.109	26.5759	SRP087703
ZAP	Texas	-99.1251	27.021	SRP087697

## Sheet: TableS4
TableS4. Results of RDA analysis of candidate climate SNPs.
Climate Variable	# Candidate SNPs	% SNP variation explained by climate	% SNP variation explained by geography
Mean daily temperature (BioClim2)	32	0.144	0.11
Isothermality (BioClim3)	51	0.15	5.6% (a)
Minimum temperture of the coldest month (BioClim6)	12	0.419	0.051
Annual mean precipitation (BioClim12)	13	0.139	0.05
Precipitation in the warmest quarter (BioClim18) (b)	1	0.304	0.206
Aridity	42	0.122	0.082
TableS4. RDA was performed on the set of candidate SNPs from the GWAS for each climate variable. The climate variable and geography (the first principal component of a PCA of latitude and longitude) were used as predictors. All explained percentages were significant at p <0.001 via 999 permutation tests each, except where noted.
(a) significant at p < 0.003
(b) RDA cannot be performed on single responses (SNPs) so for BioClim18 we report the variance explained via linear regressions (adj-Rsq values)

## Sheet: TableS5
Table S5. Isolation by distance
Group (map color)	Mantel's r	Significance p
All P.hallii	0.26	0.983*
NW hallii (red)	0.58	0.001
Central TX hallii (blue)	-0.083	0.613
Mexican hallii (yellow)	0.453	0.001
South TX hallii (purple)	0.728	0.001
Filipes (green)	0.129	0.209
Mantel tests were used to measure the strength and significance of isolation by distance within each population subgroup. Significant IBD is highlighted in bold. See Fig 1 for group color designations
* significance tested with permutations stratified by population group
